# Supplementary material
Source: PubMed Central journal article supplement (PMC6390846)
Supplement: NIHMS1008876-supplement-Supplement.pdf [file NIHMS1008876-supplement-Supplement.pdf]

## Supplementary Online Content

Dowell D, Haegerich TM, Chou R. CDC guideline for prescribing opioids for chronic pain, 2016. *JAMA*. doi:10.1001/jama.2016.1464.

eFigure. Checklist for prescribing opioids for chronic pain.

This supplementary material has been provided by the authors to give readers additional information about their work.

# Checklist for prescribing opioids for chronic pain

For primary care providers treating adults (18+) with chronic pain  $\geq 3$  months, excluding cancer, palliative, and end-of-life care

## CHECKLIST

### When **CONSIDERING** long-term opioid therapy

- ☐ Set realistic goals for pain and function based on diagnosis (eg, walk around the block).
- ☐ Check that non-opioid therapies tried and optimized.
- ☐ Discuss benefits and risks (eg, addiction, overdose) with patient.
- ☐ Evaluate risk of harm or misuse.
  - Discuss risk factors with patient.
  - Check PDMP.
  - Check urine drug screen.
- ☐ Set criteria for stopping or continuing opioids.
- ☐ Assess baseline pain and function (eg, PEG scale).
- ☐ Schedule initial reassessment within 1–4 weeks.
- ☐ Prescribe short-acting opioids using lowest dosage on product labeling; match duration to scheduled reassessment.

### If **RENEWING** without patient visit

- ☐ Check that return visit is scheduled  $\leq 3$  months from last visit.

### When **REASSESSING** at return visit

**Continue opioids only after confirming clinically meaningful improvements in pain and function without significant risks or harm.**

- ☐ Assess pain and function (eg, PEG); compare results to baseline.
- ☐ Evaluate risk of harm or misuse:
  - Observe patient for signs of over-sedation or overdose risk.
    - If yes: Taper dose.
  - Check PDMP.
  - Check for opioid use disorder if indicated (eg, difficulty controlling use).
    - If yes: Refer for treatment.
- ☐ Check that non-opioid therapies optimized.
- ☐ Determine whether to continue, adjust, taper, or stop opioids.
- ☐ Calculate opioid dosage morphine milligram equivalent (MME).
  - If  $\geq 50$  MME/day total ( $\geq 50$  mg hydrocodone;  $\geq 33$  mg oxycodone), increase frequency of follow-up; consider offering naloxone.
  - Avoid  $\geq 90$  MME/day total ( $\geq 90$  mg hydrocodone;  $\geq 60$  mg oxycodone), or carefully justify; consider specialist referral.
- ☐ Schedule reassessment at regular intervals ( $\leq 3$  months).

## REFERENCE

### EVIDENCE ABOUT OPIOID THERAPY

- *Benefits of long-term opioid therapy for chronic pain not well supported by evidence.*
- *Short-term benefits small to moderate for pain; inconsistent for function.*
- *Insufficient evidence for long-term benefits in low back pain, headache, and fibromyalgia.*

### NON-OPIOID THERAPIES

Use alone or combined with opioids, as indicated:

- Non-opioid medications (eg, NSAIDs, TCAs, SNRIs, anti-convulsants).
- Physical treatments (eg, exercise therapy, weight loss).
- Behavioral treatment (eg, CBT).
- Procedures (eg, intra-articular corticosteroids).

### EVALUATING RISK OF HARM OR MISUSE

**Known risk factors** include:

- Illegal drug use; prescription drug use for nonmedical reasons.
- History of substance use disorder or overdose.
- Poor mental health (eg, depression, anxiety).
- Sleep-disordered breathing.
- Concurrent benzodiazepine use.

**Urine drug testing:** Check to confirm presence of prescribed substances and for undisclosed prescription drug or illicit substance use.

**Prescription Drug Monitoring Program (PDMP):** Check for opioids or benzodiazepines from other sources.

### ASSESSING PAIN & FUNCTION USING PEG SCALE

**PEG score** = average 3 individual question scores (30% improvement from baseline is clinically meaningful)

**Q1:** *What number from 0–10 best describes your **pain** in the past week?*  
0 = “no pain”, 10 = “worst you can imagine”

**Q2:** *What number from 0–10 describes how, during the past week, pain has interfered with your **enjoyment of life**?*  
0 = “not at all”, 10 = “complete interference”

**Q3:** *What number from 0–10 describes how, during the past week, pain has interfered with your **general activity**?*  
0 = “not at all”, 10 = “complete interference”

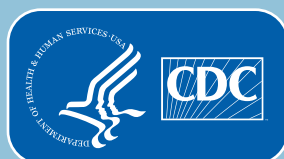

U.S. Department of  
Health and Human Services  
Centers for Disease  
Control and Prevention

## TO LEARN MORE

[WWW.CDC.GOV/DRUGOVERDOSE/PRESCRIBING/GUIDELINE](http://WWW.CDC.GOV/DRUGOVERDOSE/PRESCRIBING/GUIDELINE)
